# Supplementary material for: Blue fluorescence-assisted SrTi1 − xCryO3 for efficient persistent photocatalysis
Source: Royal Society of Chemistry journal article supplement (doi:10.1039/c2ra20278f), 2012-01-01
Supplement: c2ra20278f.pdf [file c2ra20278f.pdf]

# Blue-fluorescence-assisted SrTi<sub>1-x</sub>Cr<sub>y</sub>O<sub>3</sub> for efficient persistent photocatalysis

Huihui Li<sup>a,b\*</sup>, Shu Yin<sup>a</sup>, Yuhua Wang<sup>b</sup> and Tsugio Sato<sup>a</sup>

<sup>a</sup> Institute of Multidisciplinary Research for Advanced Materials

Tohoku University, 2-1-1

Katahira, Aoba-ku, Sendai, 980-8577, Japan

<sup>b</sup> Lanzhou University, P.R.China

E-mail: [lihuihui@mail.tagen.tohoku.ac.jp](mailto:lihuihui@mail.tagen.tohoku.ac.jp)

## Experimental

### 1. Preparation of composite photocatalysts

In the present research, SrTi<sub>1-x</sub>Cr<sub>y</sub>O<sub>3</sub> nanoparticles were synthesized by microwave-assisted solvothermal reactions of SrCl<sub>2</sub>, Cr(NO<sub>3</sub>)<sub>3</sub> and Ti(OC<sub>3</sub>H<sub>7</sub>)<sub>4</sub> in KOH aqueous solutions at 200°C for 3 h<sup>1</sup>. Then, the obtained SrTi<sub>1-x</sub>Cr<sub>y</sub>O<sub>3</sub> nanoparticles were mixed with desired amounts of CaAl<sub>2</sub>O<sub>4</sub>:(Eu,Nd) powders by a planetary ball milling at 200 rpm for 20 min.

### 2. Photocatalytic degradation characterization

The photocatalytic activity of the as-prepared CaAl<sub>2</sub>O<sub>4</sub>:(Eu,Nd)/SrTi<sub>1-x</sub>Cr<sub>y</sub>O<sub>3</sub> composite was evaluated for the oxidative destruction of NO using a flow type reactor by measuring the concentration of NO gas at the outlet of the reactor (373 cm<sup>3</sup> of internal volume) during the photo-irradiation of a constantly flowing 1 ppm NO/50 vol.% air mixed (balance N<sub>2</sub>) gas (200 cm<sup>3</sup>·min<sup>-1</sup>). 0.16 g of the sample was placed in the area of a hollow of 40×30×0.5 mm on a glass

---

\* Electronic mail: [lihuihui@mail.tagen.tohoku.ac.jp](mailto:lihuihui@mail.tagen.tohoku.ac.jp)

holder plate and set in the bottom center of the reactor<sup>2</sup>. An artificial solar light consisted of a compact xenon lamp with 69.7 W/m<sup>2</sup> of light intensity was used as the light source. Before light irradiation, the NO gas was continuously flowed through the reactor for 10 min to achieve adsorption balance. Then, the light was irradiated for 30 min to realize the steady status of the photocatalytic NO degradation and let long afterglow phosphor CaAl<sub>2</sub>O<sub>4</sub>:(Eu,Nd) absorb enough exciting energy. After that, the light was switched off, while the NO gas was flowed further for 180 min.

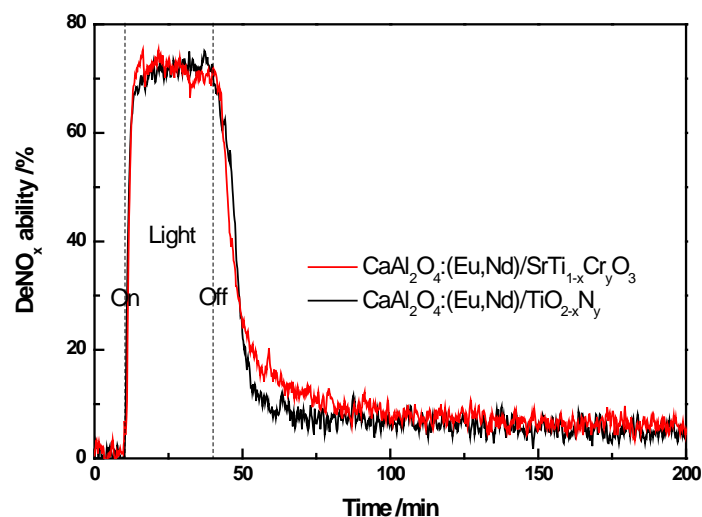

Fig. S1. Photocatalytic NO destruction activity of CaAl<sub>2</sub>O<sub>4</sub>:(Eu, Nd)/SrTi<sub>1-x</sub>Cr<sub>y</sub>O<sub>3</sub> and CaAl<sub>2</sub>O<sub>4</sub>:(Eu, Nd)/TiO<sub>2-x</sub>N<sub>y</sub> composite during artificial solar light irradiation with light intensity of 69.7 W/m<sup>2</sup> for 30 min, followed by turning off light.

#### Reference

1. U. Sulaeman, S. Yin, and T. Sato, *Appl. Phys. Lett.*, 2010, **97**, 103102.
2. S. Yin, H. Hasegawa, D. Maeda, M. Ishitsuka, and T. Sato, *J. Photoch. Photobio. A: Chem.*, 2004, **163**, 1.
